# Supplementary material for: Continuous synthesis of carbon dots with full spectrum fluorescence and the mechanism of their multiple color emission
Source: Royal Society of Chemistry journal article supplement (doi:10.1039/c9lc00683d), 2019-01-01
Supplement: c9lc00683d1.pdf [file c9lc00683d1.pdf]

## Supporting Information

### Continuous Synthesis of Carbon Dots with Full Spectrum Fluorescence and the Mechanism of Multiple Color Emission

*Meng Shao, Qin Yu, Nan Jing, Yu Cheng, Dong Wang\*, Yun-Dong Wang, Jian-Hong Xu\**

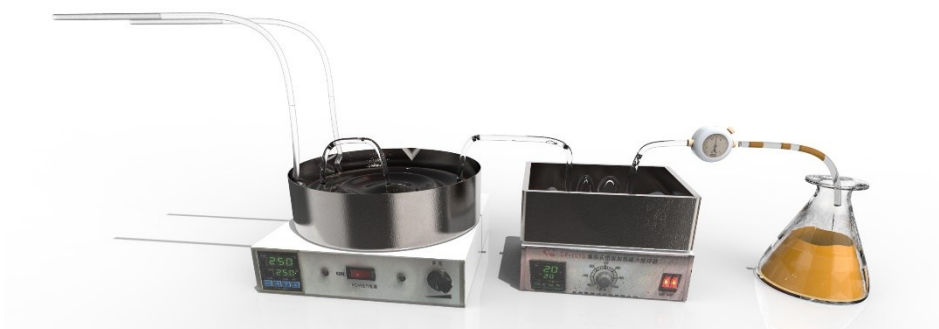

Figure S1. The schematic diagram of continuous method for full-spectrum carbon dots synthesis.

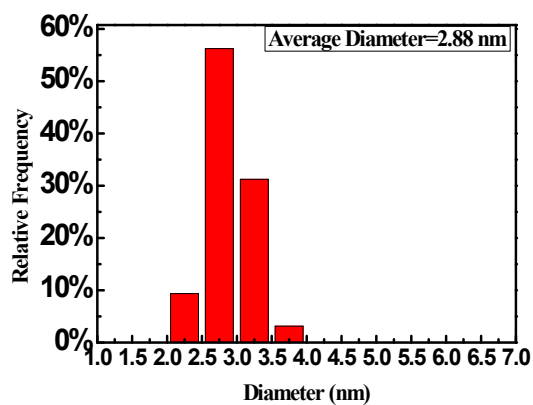

Figure. S2: The size distribution of CDs synthesized by a microreactor.

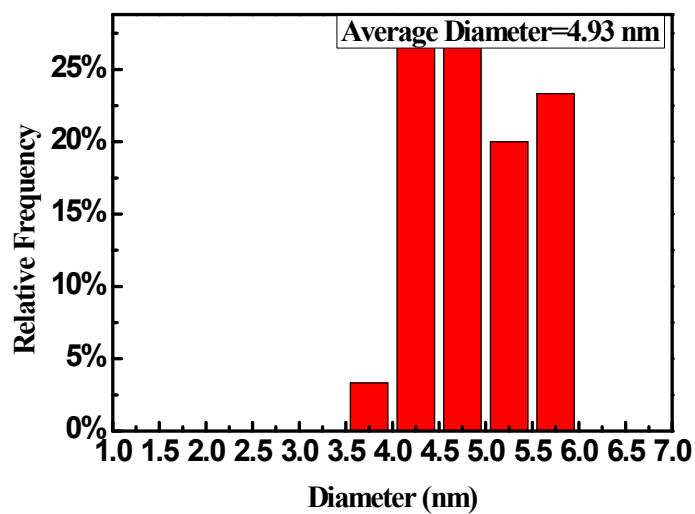

Figure. S3: The size distribution of CDs synthesized by an autoclave.

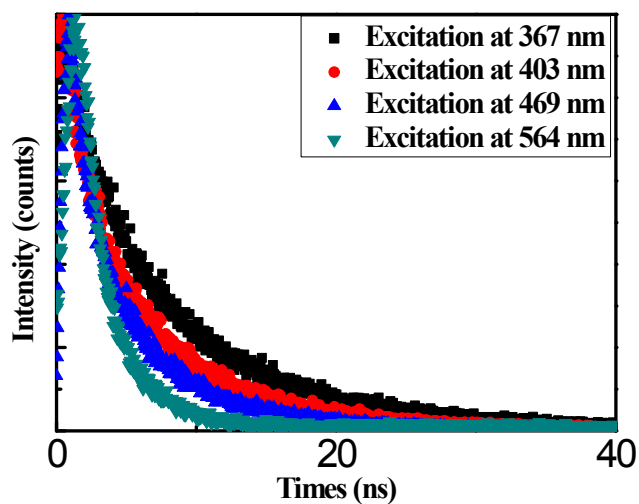

Figure. S4: Lifetime decay profiles of the carbon dots with full spectrum fluorescence under different excitation at 367, 403, 469, 564 nm.

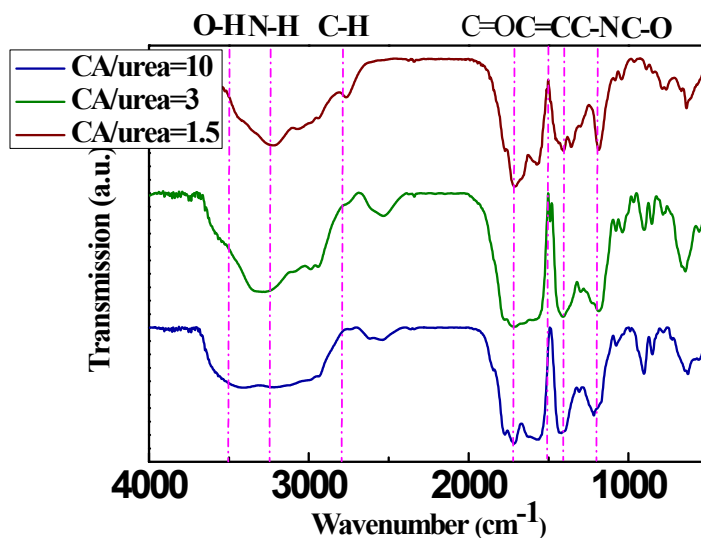

Figure. S5: The FTIR spectrum of three groups of samples.

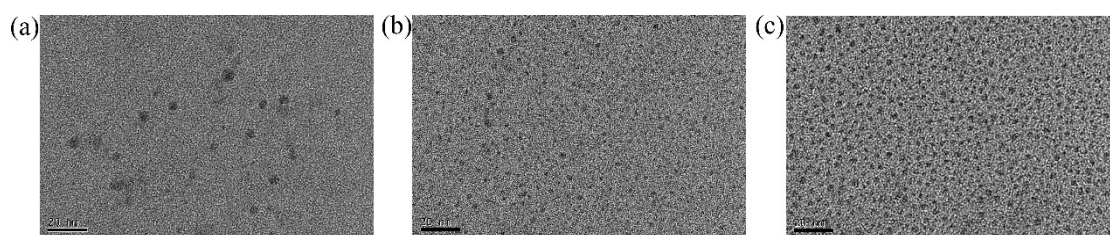

Figure. S6: The TEM image of sample A, B and C respectively. The scale bar of all the pictures is 20 nm.

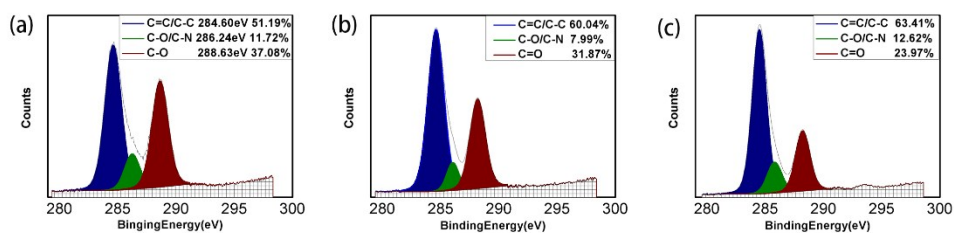

Figure. S7: (a) The XPS analysis of C1s at sample A. (b) The XPS analysis of C1s at sample B. (c) The XPS analysis of C1s at sample C.

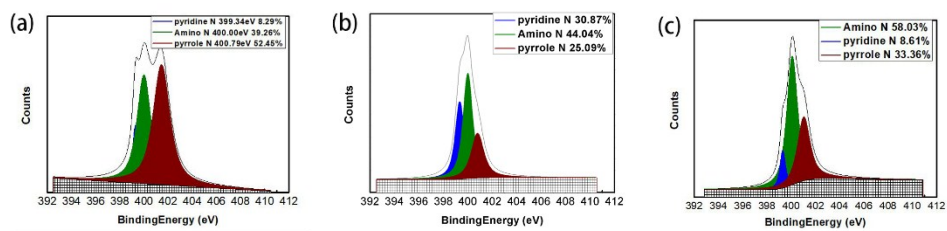

Figure. S8: (a) The XPS analysis of N1s at sample A. (b) The XPS analysis of N1s at sample B. (c) The XPS analysis of N1s at sample C.

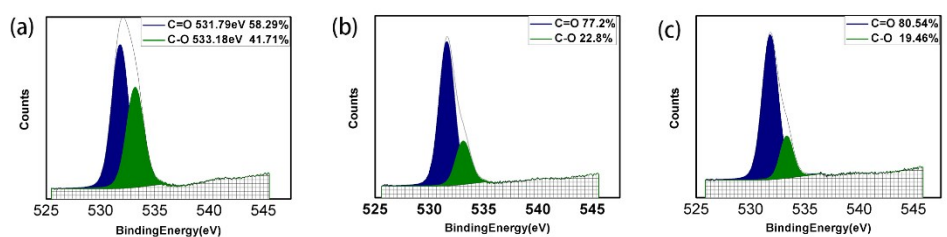

Figure. S9: (a) The XPS analysis of O1s at sample A. (b) The XPS analysis of O1s at sample B. (c) The XPS analysis of O1s at sample C.

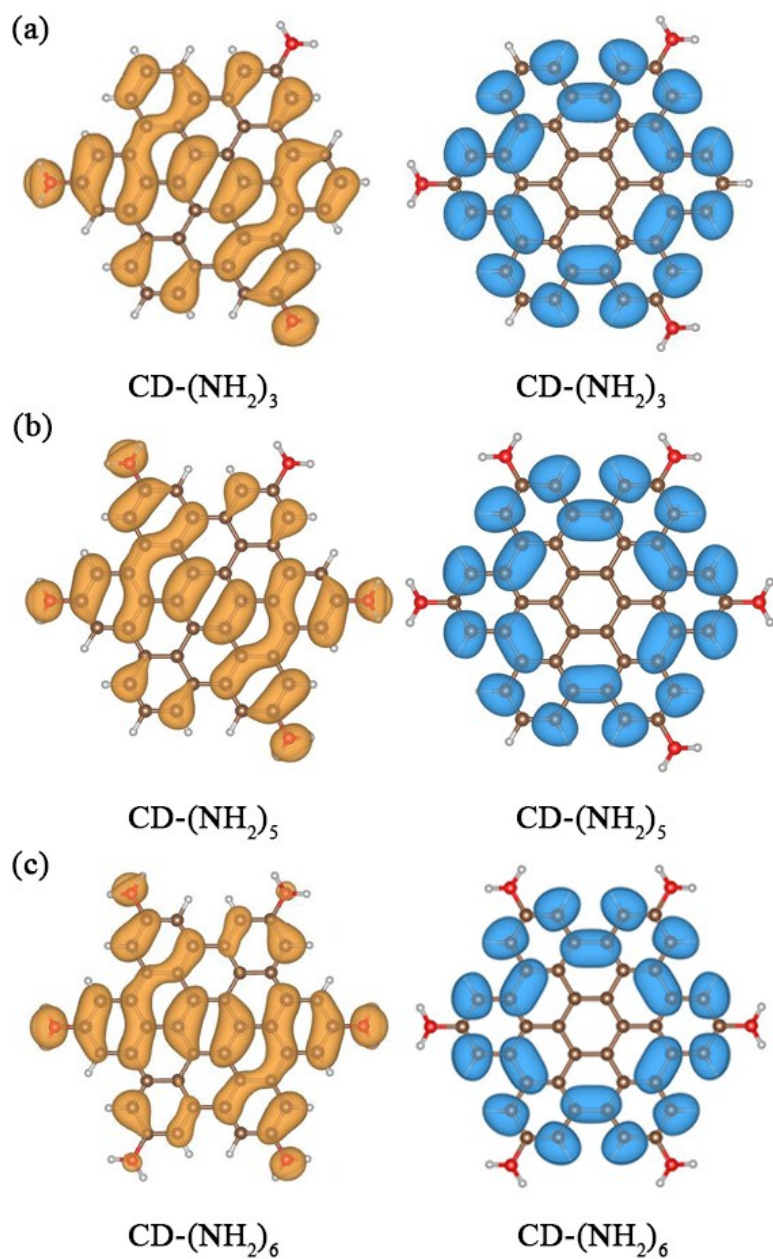

Figure. S10: HOMO and LUMO charge densities of CD-(NH<sub>2</sub>)<sub>5</sub> and CD-(NH<sub>2</sub>)<sub>6</sub> with same isosurface value, and the brown, red and gray spheres represent C, N and H atoms, respectively.

Table S1 Experimental conditions of three groups of experiments.

|          | Mole flow<br>rate of CA<br>(mol/10 <sup>3</sup> min) | Mole flow<br>rate of urea<br>(mol/10 <sup>3</sup> min) | The<br>mole<br>ratio<br>of<br>CA to<br>urea | The reaction<br>time (min) | Temperature<br>(°C) |
|----------|------------------------------------------------------|--------------------------------------------------------|---------------------------------------------|----------------------------|---------------------|
| Compound |                                                      |                                                        | HOMO                                        | LUMO                       |                     |
|          |                                                      |                                                        | C p <sub>z</sub>                            | N p <sub>z</sub>           | C p <sub>z</sub>    |
| Sample A | 3.64                                                 | 0.36                                                   | 10                                          | 20                         | 250                 |
| Sample B | 3.00                                                 | 1.00                                                   | 3                                           | 20                         | 250                 |
| Sample C | 2.20                                                 | 1.80                                                   | 1.5                                         | 20                         | 250                 |

Table S2 The element compositions of CDs.

|          | C (Atomic%) | N (Atomic%) | O (Atomic%) |
|----------|-------------|-------------|-------------|
| Sample A | 53.13       | 1.2         | 45.67       |
| Sample B | 58.91       | 7.22        | 33.87       |
| Sample C | 64.24       | 9.52        | 26.24       |

Table S3 Different substitution configurations of CD-(NH<sub>2</sub>)<sub>3</sub> and their relative energy

| CD-<br>(NH <sub>2</sub> ) <sub>3</sub> | a                                                                                   | b                                                                                    | c                                                                                     |
|----------------------------------------|-------------------------------------------------------------------------------------|--------------------------------------------------------------------------------------|---------------------------------------------------------------------------------------|
| Optimize<br>d<br>structure             | 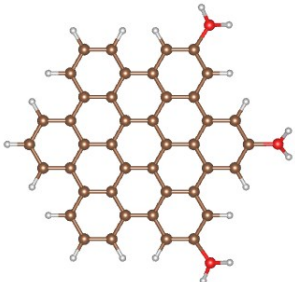 |  |  |
| Relative<br>energy<br>(eV)             | 0.00981                                                                             | 0.00838                                                                              | 0                                                                                     |

Table S4 Contributions of C p<sub>z</sub> and N p<sub>z</sub> orbitals in HOMO and LUMO of CD and CD-(NH<sub>2</sub>)<sub>n</sub> (n= 1, 5, 6)

|                                        |       |       |      |
|----------------------------------------|-------|-------|------|
| <b>CD</b>                              | 100%  | 0     | 100% |
| <b>CD-(NH<sub>2</sub>)<sub>1</sub></b> | 87.2% | 12.8% | 100% |
| <b>CD-(NH<sub>2</sub>)<sub>3</sub></b> | 86.8% | 13.2% | 100% |
| <b>CD-(NH<sub>2</sub>)<sub>5</sub></b> | 82.1% | 17.9% | 100% |
| <b>CD-(NH<sub>2</sub>)<sub>6</sub></b> | 82.3% | 17.7% | 100% |

---
